# Supplementary material for: Global potential distribution of Drosophila suzukii (Diptera, Drosophilidae)
Source: PLoS One. 2017 Mar 21;12(3):e0174318. doi: 10.1371/journal.pone.0174318 (PMC5360346; doi:10.1371/journal.pone.0174318)
Supplement: S1 Table — (XLSX) [file pone.0174318.s002.xlsx]

## Sheet: Plan1
Results of the Principal Components Analysis conducted to variables selection to inserction in the modeling
PC	Eigenvalue	% variance
1	7.39347	36.967
2	4.23647	21.182
3	2.78189	13.909
4	2.47103	12.355
5	1.29756	6.4878
6	0.671027	3.3551
7	0.441571	2.2079
8	0.236838	1.1842
9	0.187169	0.93585
10	0.102315	0.51158
11	0.085682	0.42841
12	0.0426848	0.21342
13	0.021152	0.10576
14	0.0139117	0.069559
15	0.00821199	0.04106
16	0.00448122	0.022406
17	0.00346494	0.017325
18	0.000903073	0.0045154
19	0.000166071	0.00083036
20	9.05745e-20	4.5287e-19
