# Supplementary material for: Global potential distribution of Drosophila suzukii (Diptera, Drosophilidae)
Source: PLoS One. 2017 Mar 21;12(3):e0174318. doi: 10.1371/journal.pone.0174318 (PMC5360346; doi:10.1371/journal.pone.0174318)
Supplement: S2 Table — (XLSX) [file pone.0174318.s003.xlsx]

## Sheet: Plan1
Correlation between the Principal Components obtained and the environmental variables values used to select the layers to modeling.
	Axis 1	Axis 2	Axis 3	Axis 4	Axis 5	Axis 6	Axis 7	Axis 8	Axis 9	Axis 10	Axis 11	Axis 12	Axis 13	Axis 14	Axis 15	Axis 16	Axis 17	Axis 18	Axis 19	Axis 20
bio2	2.024e-05	-0.3323	-0.2662	0.1263	0.8529	0.2022	-0.157	-0.009632	0.05398	-0.04496	-0.02741	-0.04613	-0.02666	-0.01827	-0.02405	-0.01021	0.007892	0.0008671	0.0001465	-6.238e-20
bio6	0.911	-0.231	0.2884	0.06054	-0.1344	0.04922	0.01127	0.007279	-0.066	-0.01063	-0.02303	-0.04983	-0.0006166	0.03542	-0.003035	-0.013	0.01773	0.004376	2.009e-05	2.12e-10
bio4	-0.8049	0.4342	-0.2225	0.2889	0.07336	-0.1104	0.07283	0.04555	0.03288	0.02958	0.007401	0.04017	0.0328	0.007674	-0.005808	-0.01252	0.02196	0.009165	0.008089	2.412e-19
Bio1	0.9231	0.001622	0.1944	0.3072	-0.002597	0.07484	0.02296	-0.008098	-0.0524	0.05232	-0.001008	0.007361	0.00875	-0.05417	-0.008807	0.01917	-0.01132	0.01987	0.0002298	1.593e-19
bio3	0.7101	-0.5046	0.1377	-0.2363	0.2349	0.1628	-0.2488	-0.006964	0.06713	0.03422	0.02506	0.1074	0.06068	0.02379	0.02734	0.001325	0.001676	0.0002727	2.243e-05	7.459e-20
Altitude	0.2431	0.1191	-0.2174	-0.7327	0.1686	0.3398	0.3901	0.2083	-0.03877	0.03563	-0.007278	0.01666	0.007099	0.0008113	-0.004408	-0.0002703	-0.0002229	-0.0004933	-6.107e-05	-1.703e-21
bio5	0.4696	0.2185	0.04465	0.7695	0.3112	0.01084	0.1345	0.07113	-0.1013	-0.03548	-0.02082	-0.0337	0.001571	0.05698	0.03244	0.009041	-0.005802	0.001426	-0.0002281	-9.056e-11
bio10	0.5439	0.3733	0.1053	0.7258	0.04313	-0.01634	0.08966	0.02939	-0.04499	0.08666	-0.002595	0.06343	0.02301	-0.0259	-0.02567	-0.01758	0.01107	-0.01164	-0.004071	-2.402e-19
bio11	0.9405	-0.1998	0.2381	0.07761	-0.04719	0.08042	-0.01761	-0.01727	-0.04473	0.01411	-0.01056	-0.006716	-0.02007	-0.01493	-0.005158	0.004936	-0.01407	-0.01392	0.009153	1.335e-19
bio12	0.1888	0.7685	0.5059	-0.26	0.1341	-0.03909	-0.007595	-0.05854	-0.02814	-0.059	-0.09394	0.09058	-0.07297	-0.0008081	0.01446	-0.01811	-0.002387	0.004267	2.144e-05	2.374e-20
bio13	0.5517	0.7029	-0.05666	-0.3179	0.186	-0.1546	-0.002612	-0.08432	-0.06772	-0.08019	0.1283	-0.02355	0.04789	0.008749	-0.01792	-0.02327	-0.02184	0.001808	0.0002217	-2.514e-20
bio14	-0.5765	0.2128	0.7448	0.07917	0.0585	0.187	-0.02475	-0.01339	0.04774	0.06349	0.1007	0.02099	-0.02929	0.04794	-0.04241	0.01814	-0.004091	0.00141	-8.327e-05	6.654e-21
bio15	0.7293	0.1828	-0.5179	-0.1488	0.08729	-0.2623	-0.1097	0.1084	0.03742	0.168	0.1005	-0.0105	-0.06339	0.009256	0.01361	-0.003768	0.002435	0.001412	-0.0001155	-4.126e-20
bio16	0.5455	0.7168	0.02076	-0.342	0.1864	-0.1499	-0.0156	-0.06723	-0.04746	-0.06227	0.02102	-0.003716	0.01035	-0.0111	-0.001018	0.03941	0.03043	-0.004994	-0.0001396	3.701e-20
bio17	-0.5181	0.2439	0.7785	0.01714	0.09759	0.1859	0.0226	-0.00648	0.01191	0.04123	0.1078	-0.06077	0.004274	-0.03999	0.0452	-0.01247	0.009888	-0.001971	0.0001065	-3.742e-20
bio18	0.1991	0.9206	-0.005804	-0.1423	0.01139	0.1009	-0.05032	-0.1067	0.1637	0.1315	-0.1363	-0.0654	0.03407	0.01385	0.0009738	0.0008293	-0.007942	-0.0008942	-6.668e-05	-3.916e-21
bio19	-0.262	-0.186	0.7325	-0.2387	0.221	-0.4001	-0.1035	0.2757	-0.02349	0.01759	-0.07246	-0.02335	0.0281	-0.006613	-0.01002	0.001816	-0.006194	-0.0007831	-9.564e-05	-1.749e-20
bio8	0.4963	0.6264	-0.09245	0.2694	-0.3176	0.1859	-0.1632	0.2517	0.1893	-0.1343	0.02971	-0.004344	-0.005532	-0.007549	-0.002092	0.000221	0.0001279	-2.333e-05	-7.482e-05	-1.082e-20
bio9	0.6077	-0.5011	0.2893	0.07459	0.1368	-0.2602	0.3385	-0.08056	0.2837	-0.04197	0.02392	0.006175	-0.004324	-0.00071	0.001354	-0.0001074	0.0005468	0.0003044	-6.78e-05	-5.752e-21
bio7	-0.7781	0.3552	-0.295	0.2938	0.2929	-0.04885	0.05058	0.02531	0.02489	-0.00496	0.01548	0.03881	0.00141	-0.01213	0.01851	0.01847	-0.02214	-0.004125	-0.0001287	1.935e-10
