# Supplementary material for: Global potential distribution of Drosophila suzukii (Diptera, Drosophilidae)
Source: PLoS One. 2017 Mar 21;12(3):e0174318. doi: 10.1371/journal.pone.0174318 (PMC5360346; doi:10.1371/journal.pone.0174318)
Supplement: S3 Table — (XLSX) [file pone.0174318.s004.xlsx]

## Sheet: Plan1
Moran’s I values for the selected environmental variables and the respective standard deviations and p-values of the Monte Carlo tests for spatial autocorrelation.
Environmental variables	Moran’s I	Standard Deviation	p value
Bio-1	-0.113	-52.013	1
Bio-2	-0.022	-8.668	1
Bio-4	-0.209	-88.13	1
Bio-5	-0.057	-25.446	1
Bio-6	-0.244	-110.101	1
Bio-7	-0.09	-42.649	1
Bio-11	-0.11	-52.018	1
Bio-12	-0.034	-15.621	1
Bio-17	-0.029	-12.186	1
Bio-18	-0.083	-39.765	1
Altitude	-0.041	-18.007	1
